# Supplementary material for: Unusual chalcogen⋯chalcogen interactions in like⋯like and unlike YCY⋯YCY complexes (Y = O, S, and Se)
Source: Royal Society of Chemistry journal article supplement (doi:10.1039/d1cp02706a), 2021-11-18
Supplement: d1cp02706a1.pdf [file d1cp02706a1.pdf]

## **Unusual Chalcogen...Chalcogen Interactions in Like...Like and Unlike $Y=C=Y...Y=C=Y$ Complexes ( $Y = O, S, \text{ and Se}$ )**

Mahmoud A. A. Ibrahim,<sup>1\*</sup> Mohammed N. I. Shehata,<sup>1</sup> Mahmoud E. S. Soliman,<sup>2</sup> Mahmoud F. Moustafa,<sup>3,4</sup> H. R. Abd El-Mageed,<sup>5</sup> and Nayra A. M. Moussa<sup>1</sup>

<sup>1</sup> Computational Chemistry Laboratory, Chemistry Department, Faculty of Science, Minia University, Minia 61519, Egypt

<sup>2</sup> Molecular Bio-computation and Drug Design Lab, School of Health Sciences, University of KwaZulu-Natal, Westville, Durban 4000, South Africa

<sup>3</sup> Department of Biology, College of Science, King Khalid University, Abha 9004, Saudi Arabia

<sup>4</sup> Department of Botany & Microbiology, Faculty of Science, South Valley University, Qena 83523, Egypt

<sup>5</sup> Micro-Analysis, Environmental Research and Community Affairs Center (MAESC), Faculty of Science, Beni-Suef University, Beni-Suef 62511, Egypt

\* Corresponding author: Mahmoud A. A. Ibrahim; [m.ibrahim@compchem.net](mailto:m.ibrahim@compchem.net)

**Table S1.** Topological parameters, including the electron density ( $\rho_b$ , au), Laplacian ( $\nabla^2\rho_b$ , au), and total energy density ( $H_b$ , au), at bond critical points (BCPs) for  $Y=C=Y\cdots Y=C=Y$  complexes (where  $Y = O, S,$  and  $Se$ ) in the fashion of type I, II, III, and IV chalcogen $\cdots$ chalcogen interactions at the most favorable parameters.

| Complex                                  | $\rho_b$<br>(au) | $\nabla^2\rho_b$<br>(au) | $H_b$<br>(au) | $\rho_b$<br>(au) | $\nabla^2\rho_b$<br>(au) | $H_b$<br>(au) |
|------------------------------------------|------------------|--------------------------|---------------|------------------|--------------------------|---------------|
|                                          | <b>Type I</b>    |                          |               | <b>Type II</b>   |                          |               |
| <b>O=C=O<math>\cdots</math>O=C=O</b>     | 0.0057           | 0.0230                   | 0.0012        | 0.0042           | 0.0186                   | 0.0011        |
| <b>O=C=O<math>\cdots</math>S=C=S</b>     | 0.0054           | 0.0248                   | 0.0016        | 0.0050           | 0.0199                   | 0.0012        |
| <b>O=C=O<math>\cdots</math>Se=C=Se</b>   | 0.0061           | 0.0260                   | 0.0015        | 0.0054           | 0.0198                   | 0.0010        |
| <b>S=C=S<math>\cdots</math>S=C=S</b>     | 0.0069           | 0.0192                   | 0.0009        | 0.0068           | 0.0224                   | 0.0012        |
| <b>S=C=S<math>\cdots</math>Se=C=Se</b>   | 0.0072           | 0.0182                   | 0.0007        | 0.0078           | 0.0234                   | 0.0010        |
| <b>Se=C=Se<math>\cdots</math>Se=C=Se</b> | 0.0080           | 0.0178                   | 0.0042        | 0.0072           | 0.0202                   | 0.0008        |
|                                          | <b>Type III</b>  |                          |               | <b>Type IV</b>   |                          |               |
| <b>O=C=O<math>\cdots</math>O=C=O</b>     | 0.0026           | 0.0127                   | 0.0008        | 0.0060           | 0.0243                   | 0.0013        |
| <b>O=C=O<math>\cdots</math>S=C=S</b>     | 0.0053           | 0.0246                   | 0.0016        | 0.0046           | 0.0152                   | 0.0008        |
| <b>O=C=O<math>\cdots</math>Se=C=Se</b>   | 0.0059           | 0.0255                   | 0.0014        | 0.0045           | 0.0138                   | 0.0006        |
| <b>S=C=S<math>\cdots</math>S=C=S</b>     | 0.0055           | 0.0219                   | 0.0014        | 0.0066           | 0.0187                   | 0.0009        |
| <b>S=C=S<math>\cdots</math>Se=C=Se</b>   | 0.0061           | 0.0225                   | 0.0012        | 0.0072           | 0.0183                   | 0.0007        |
| <b>Se=C=Se<math>\cdots</math>Se=C=Se</b> | 0.0055           | 0.0194                   | 0.0010        | 0.0071           | 0.0166                   | 0.0005        |

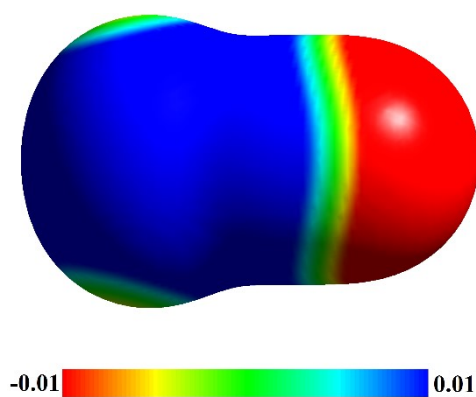

**Figure S1.** Molecular electrostatic potential (MEP) map of the SCN<sup>-</sup> molecule mapped onto 0.002 au electron density contour. The electrostatic potential varies from -0.01 (red) to +0.01 (blue) au.
